# Supplementary material for: Fabrication of Chitosan-Based Network Polysaccharide Nanogels
Source: MDPI journal article supplement (doi:10.3390/molecules27238384), 2022-12-01
Supplement: s1 [file s1]

## **Supporting Information**

### **Fabrication of Chitosan-based Network Polysaccharide Nanogels**

Aina Nakamichi and Jun-ichi Kadokawa\*

*Graduate School of Science and Engineering, Kagoshima University, 1-21-40  
Korimoto, Kagoshima 890-0065, Japan*

\* Corresponding author: E-mail: kadokawa@eng.kagoshima-u.ac.jp

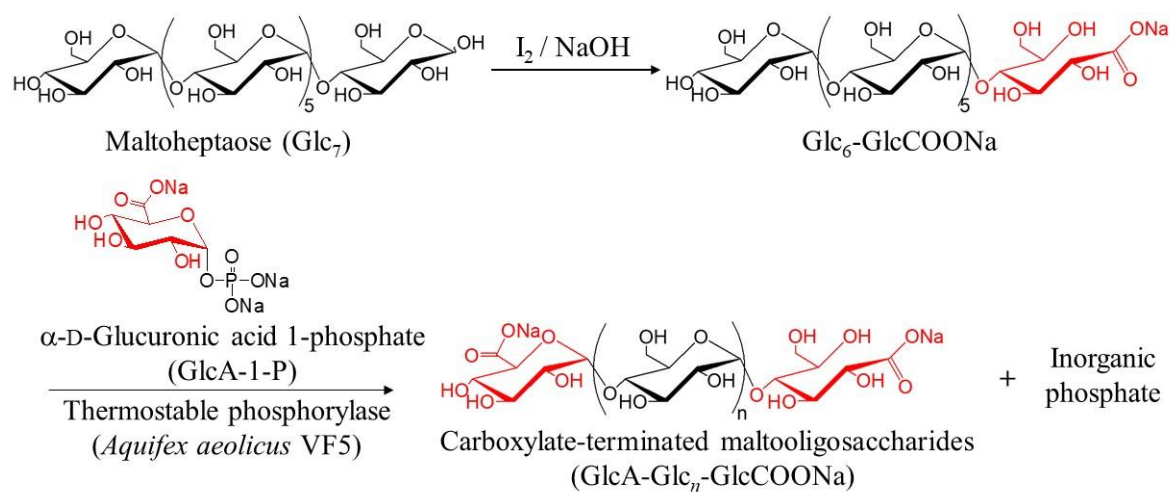

**Figure S1.** Synthesis of carboxylate-terminated maltooligosaccharides ( $\text{GlcAGlc}_n\text{-GlcCOONa}$ ).

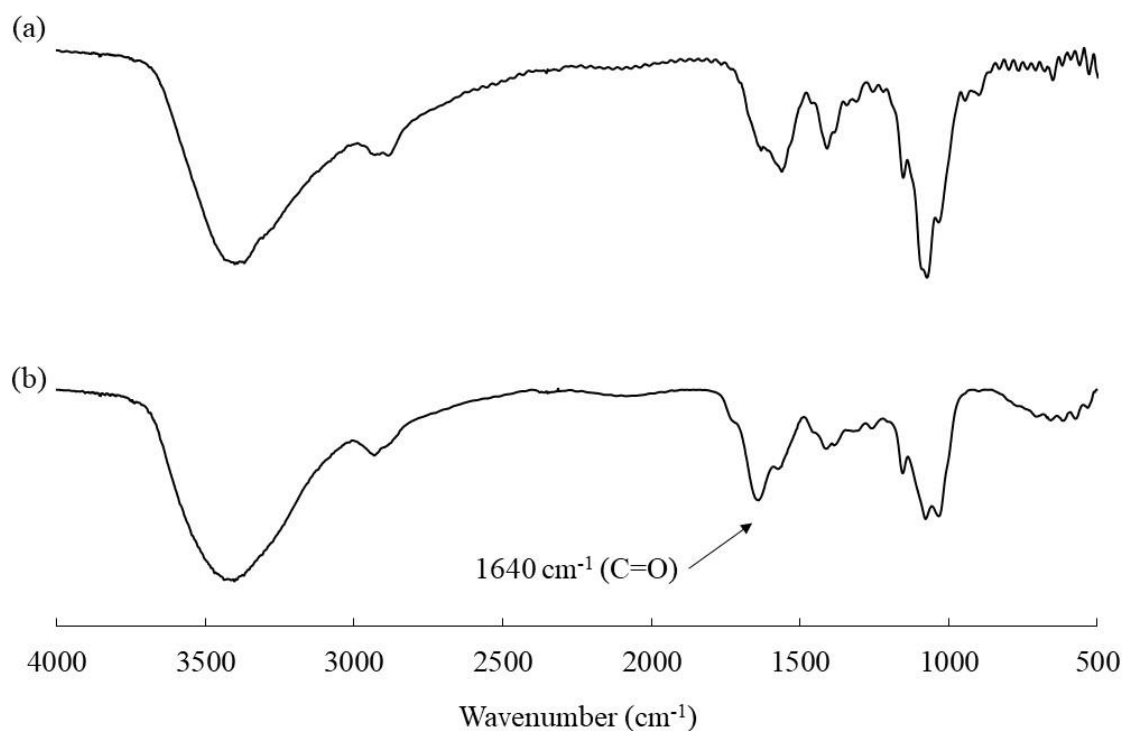

**Figure S2.** IR spectra of (a) water-soluble chitosan and (b) chitosan-based network polysaccharide (run 4).

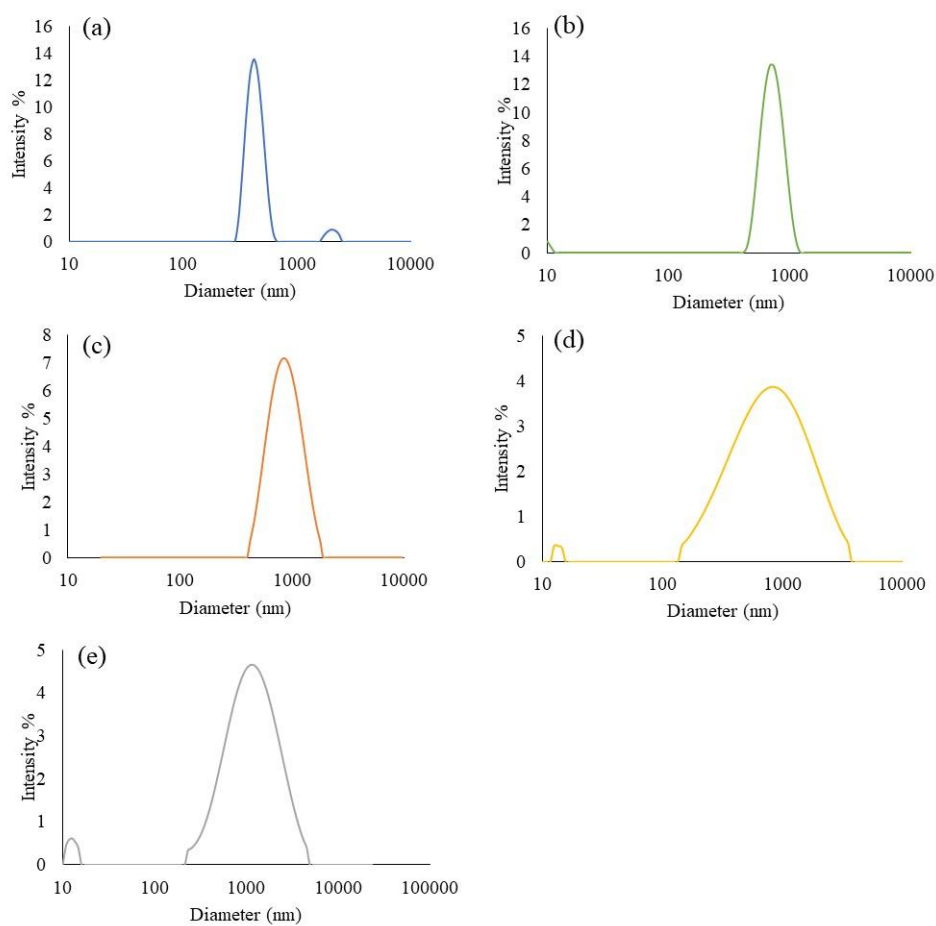

**Figure S3.** DLS profiles of chitosan-based network polysaccharides (a-e, runs 1-5).
